# Supplementary material for: A New Class of Multimerization Selective Inhibitors of HIV-1 Integrase
Source: PubMed Central journal article supplement (PMC4038613; doi:10.1371/journal.ppat.1004171), 2014-05-29

Figure S1.

### A. Synthesis of (±)KF115

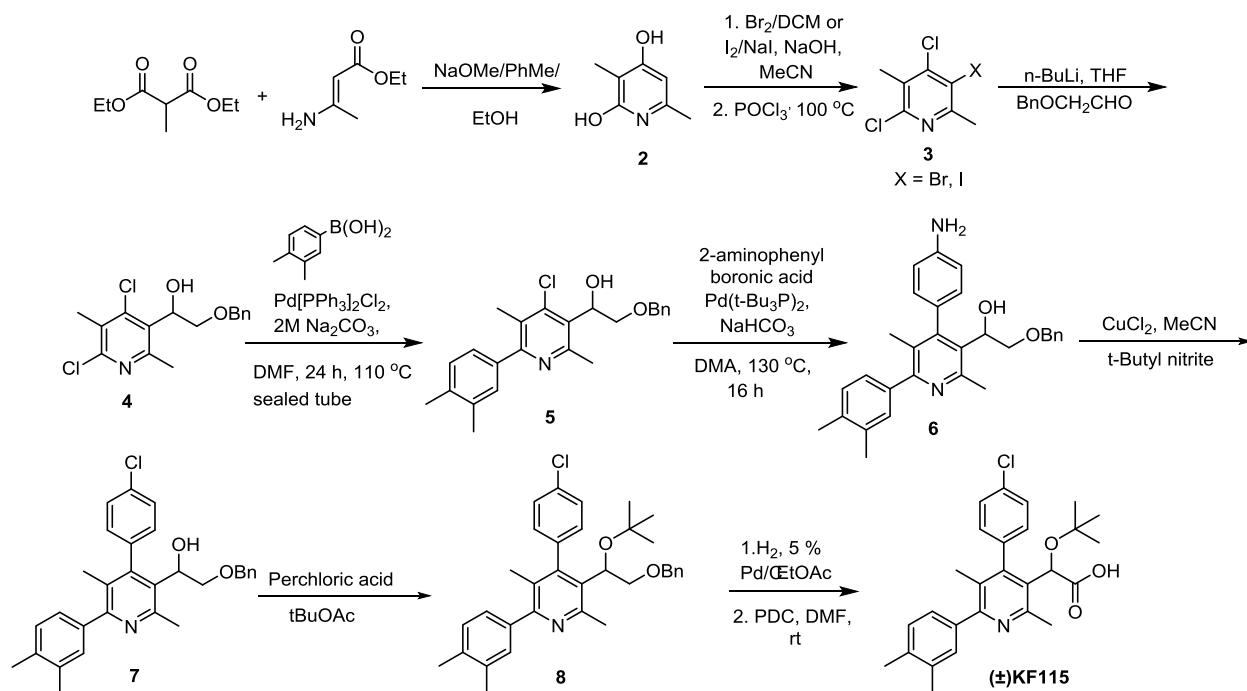

### B. Synthesis of (±)KF116

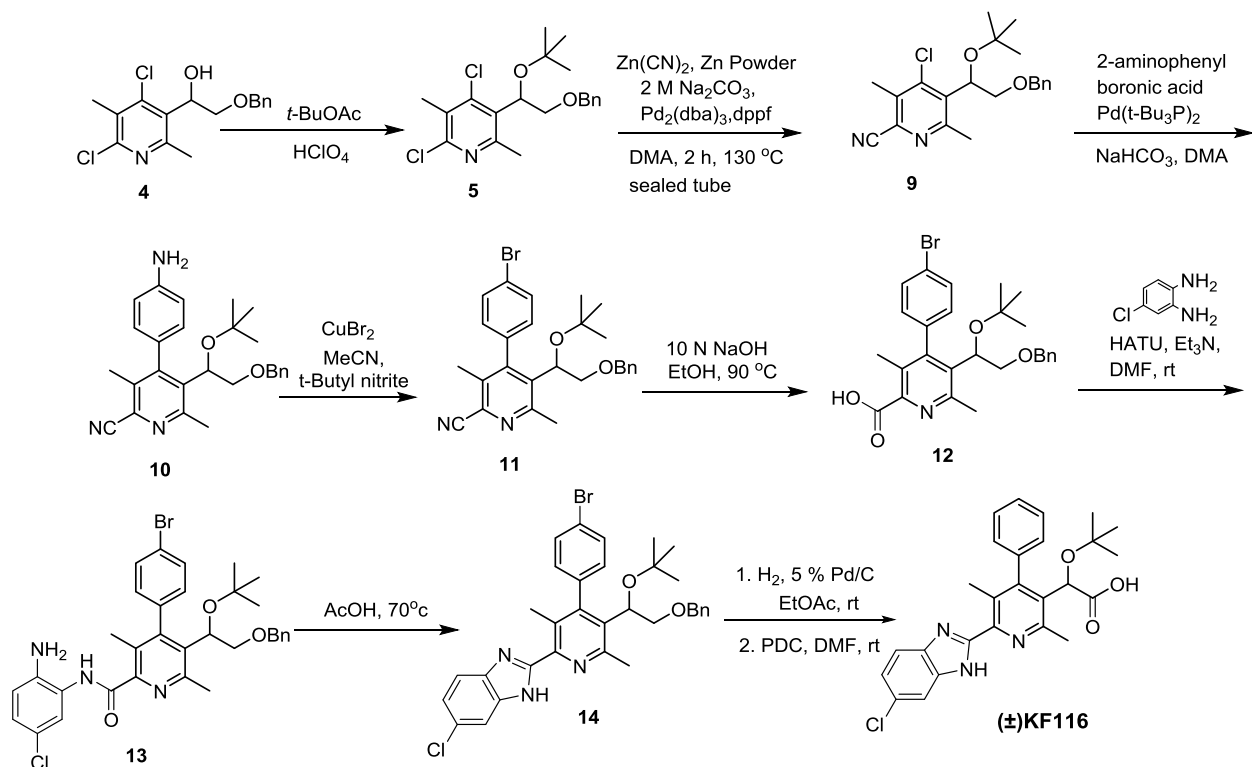

Supplement: ppat.1004171.s001.pdf [file ppat.1004171.s001.pdf]
