# Supplementary material for: A New Class of Multimerization Selective Inhibitors of HIV-1 Integrase
Source: PubMed Central journal article supplement (PMC4038613; doi:10.1371/journal.ppat.1004171), 2014-05-29

**Figure S2**

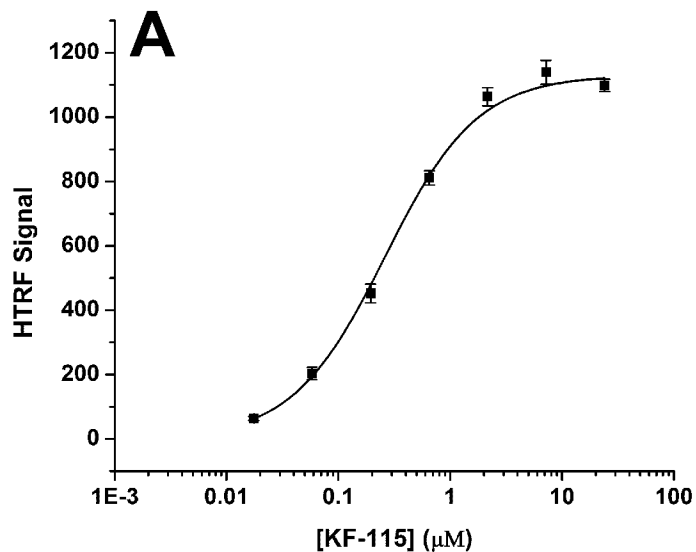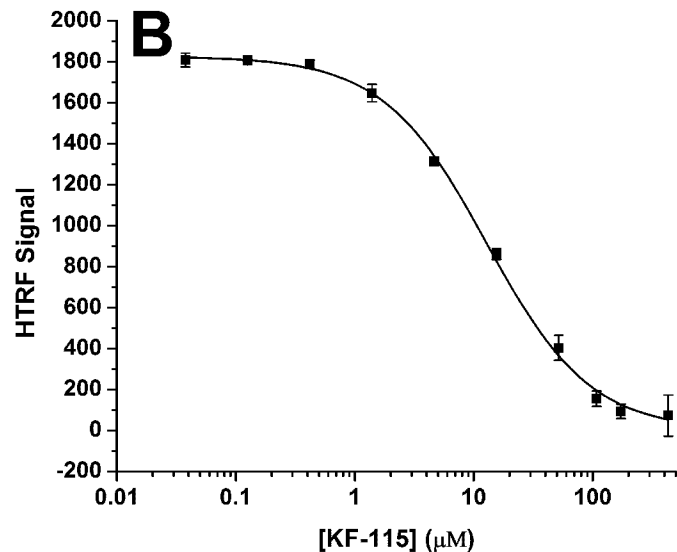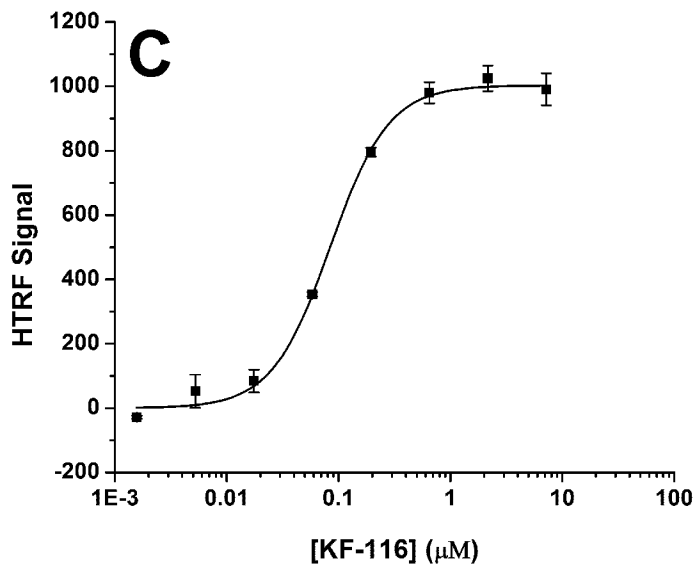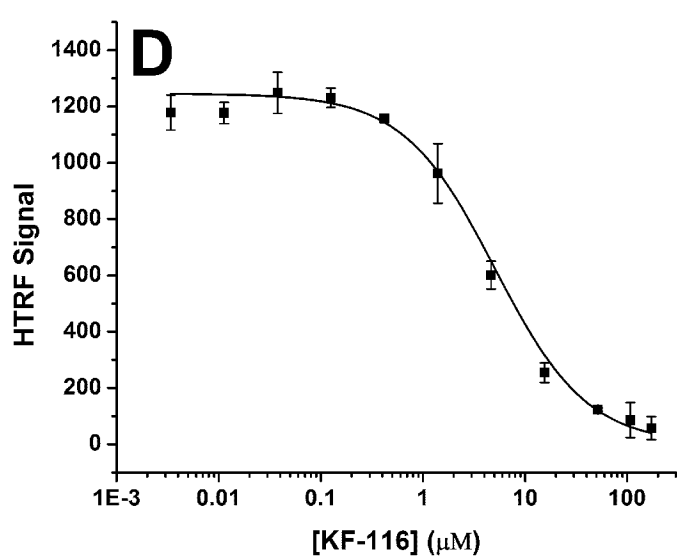

Supplement: ppat.1004171.s002.pdf [file ppat.1004171.s002.pdf]
