# Supplementary material for: A New Class of Multimerization Selective Inhibitors of HIV-1 Integrase
Source: PubMed Central journal article supplement (PMC4038613; doi:10.1371/journal.ppat.1004171), 2014-05-29

# Figure S8A

| Treatment                       | Number of sites | % in RefSeq | % in known genes |
|---------------------------------|-----------------|-------------|------------------|
| DMSO                            | 2141            | 81.83       | 83.61            |
| KF116 target cells (10 $\mu$ M) | 2097            | 83.17       | 84.31            |
| GS-B target cells (10 $\mu$ M)  | 721             | 74.76***    | 77.39***         |

# Figure S8B

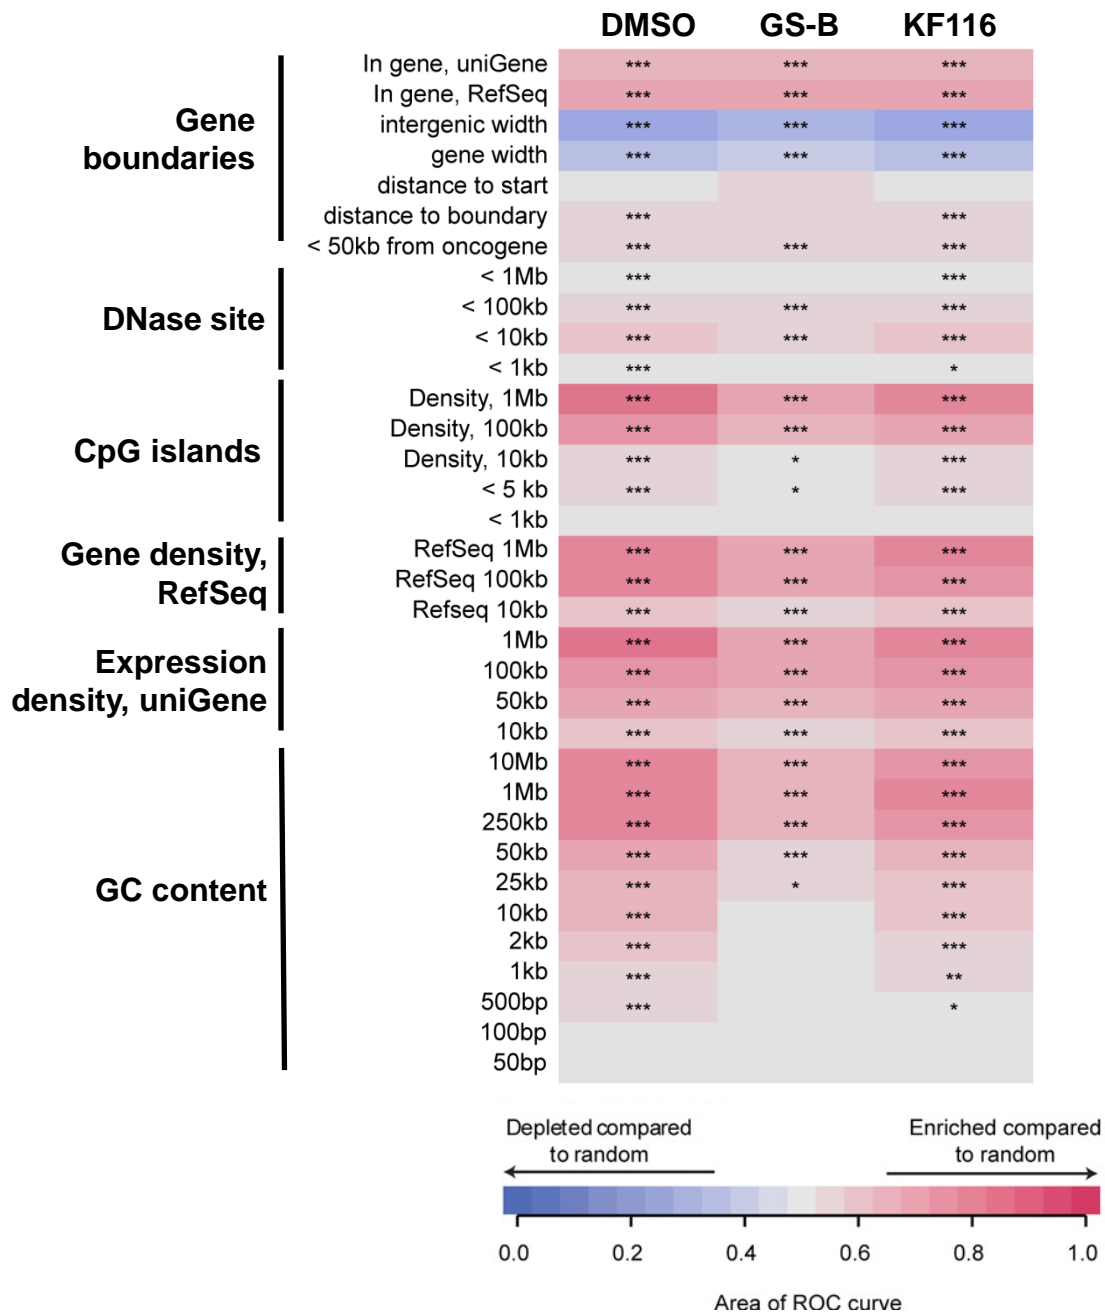

Supplement: ppat.1004171.s008.pdf [file ppat.1004171.s008.pdf]
