# Supplementary material for: A New Class of Multimerization Selective Inhibitors of HIV-1 Integrase
Source: PubMed Central journal article supplement (PMC4038613; doi:10.1371/journal.ppat.1004171), 2014-05-29
Supplement: ppat.1004171.s009.pdf [file ppat.1004171.s009.pdf]

**Table S1. X-ray crystal structure data collection and refinements**

| <b>Complex</b>                            | KF115 +<br>HIV-1 CCD F185K                                | KF116 +<br>HIV-1 CCD F185K                                | KF116 + HIV-1 IN<br>CCD F185K/A128T                       |
|-------------------------------------------|-----------------------------------------------------------|-----------------------------------------------------------|-----------------------------------------------------------|
| <b>Data Collection</b>                    |                                                           |                                                           |                                                           |
| Wavelength (Å)                            | 1.541                                                     | 1.541                                                     | 1.541                                                     |
| Space group                               | P3121                                                     | P3121                                                     | P3121                                                     |
| Unit-cell parameters<br>(Å, °)            | a=b = 72.2, c=65.2<br>$\alpha = \beta = 90, \gamma = 120$ | a=b = 71.7, c=65.9<br>$\alpha = \beta = 90, \gamma = 120$ | a=b = 72.0, c=66.2<br>$\alpha = \beta = 90, \gamma = 120$ |
| Molecules per A.S.U.                      | 1                                                         | 1                                                         | 1                                                         |
| Resolution (Å)                            | 2.04                                                      | 2.20                                                      | 2.37)                                                     |
| Completeness (%)                          | 98.9                                                      | 99.7                                                      | 99.5                                                      |
| R <sub>merge</sub> (%)                    | 4.5 (47.7)                                                | 4.2 (58.4)                                                | 4.8 (55.8)                                                |
| Redundancy                                | 5.2 (5.2)                                                 | 4.7 (4.7)                                                 | 5.0 (5.0)                                                 |
| I/ $\sigma$                               | 45.3 (4.36)                                               | 39.6 (2.88)                                               | 45.2 (3.63)                                               |
| <b>Structure Refinement</b>               |                                                           |                                                           |                                                           |
| Resolution (Å)                            | 2.05                                                      | 2.24                                                      | 2.37                                                      |
| R <sub>work</sub> / R <sub>free</sub> (%) | 0.1838 / 0.2315                                           | 0.1751 (0.2588)                                           | 0.1851 / 0.2330                                           |
| <b>R.M.S.D. from ideal values</b>         |                                                           |                                                           |                                                           |
| Bond length (Å)                           | 0.0184                                                    | 0.0149                                                    | 0.0159                                                    |
| Bond angle (°)                            | 2.118                                                     | 1.809                                                     | 1.871                                                     |
| Average B factor                          | 49.6                                                      | 43.1                                                      | 44.6                                                      |
| PDB #                                     | <b>4O0J</b>                                               | <b>4O55</b>                                               | <b>4O5B</b>                                               |
